# Supplementary material
Source: PubMed Central journal article supplement (PMC3545825)
Supplement: 1213819110_pnas.201213819SI.pdf [file 1213819110_pnas.201213819SI.pdf]

# Supporting Information

Jin et al. 10.1073/pnas.1213819110

## SI Materials and Methods

**Reagents and Antibodies.** Antibodies to Ubc12, phospho-Erk1/2, phospho-p38, p38, and phospho-PLC $\gamma$ 1 were purchased from Cell Signaling Technology. Antibodies to ZAP-70, I $\kappa$ B- $\alpha$ , Erk2, Cullin-1, Shc, Grb2, and HA were purchased from Santa Cruz Biotechnology. Anti-FLAG antibody was purchased from Sigma-Aldrich. All fluorochrome-tagged antibodies were purchased from eBioscience. MLN4924 was purchased from Active Biochem. CellTrace Violet and EdU (5-ethynyl-2'-deoxyuridine) were purchased from Invitrogen.

**DNA Constructs.** Plasmids to express HA-NEDD8, RGS-Ubc12, and p66Shc were obtained from Addgene. To generate the FLAG-tagged versions of p66Shc, p52Shc, and p46Shc, the p66Shc cDNA was PCR-amplified and subcloned into pCS2-FLAG vector. Point mutation was generated using the QuikChange XL Site-Directed Mutagenesis Kit (Stratagene) according to the manufacturer's instructions. WT p52Shc and K3R p52Shc cDNAs were cloned into pMIG retroviral vectors and used to transduce primary CD4<sup>+</sup> T cells. For construction of shRNA expression vectors, oligonucleotides were cloned in the LMP vector according to the manufacturer's protocol (Open Biosystems). Oligonucleotide sequences were as follows: Ubc12 shRNA, 5'-TGCTGTTGACAGTGAGCGCCCTGATGAAGGCTTCTACAAATAGTGAAGCCACAGATGTATTTGTAGAAGCCTTCATCAGGATGCCTACTGCTCGGA-3'; Nedd8 shRNA, 5'-TGCTGTTGACAGTGAGCGAACAGACAAGGTGGAGCGAATCTAGTGAAGCCACAGATGTAGATTCGCTCCACCTTGTCTGTGTGCCTACTGCTCGGA-3'; Nae1 shRNA, 5'-TGCTGTTGACAGTGAGCGCTCATGTTTGCTTAATAAATTAGTGAAGCCACAGATGTAATTTATTAAGCAAACATGAGCATGCCTACTGCTCGGA-3'.

**T-Cell Proliferation and IL-2 Production.** FACS-sorted CD4<sup>+</sup> T cells were activated with various concentrations of anti-CD3 (clone 145-2C11; BioLegend) and anti-CD28 (clone 37.1; Bio X Cell). T-cell proliferation was assessed by EdU labeling according to the manufacturer's instructions (Invitrogen), followed by flow cytometry or, alternatively, the addition of 1  $\mu$ Ci/mL of <sup>3</sup>H-thymidine,

with cell-incorporated radiation monitored by a  $\beta$ -plate counter. Cell division was analyzed by prelabeling CD4<sup>+</sup> T cells with 5  $\mu$ M CellTrace Violet (Invitrogen). IL-2 production was analyzed by ELISA or intracellular staining.

**Th-Cell Differentiation in Vitro.** Purified naive CD4<sup>+</sup> T cells from control or shUbc12-expressing chimeric mice were stimulated with plate-bound anti-CD3 and soluble anti-CD28 in the presence of irradiated splenocytes. Cells were polarized into Th1 cells by culturing with human rIL-2 (100 U/mL), mouse IL-12 (10 ng/mL; Peprotech), and anti-mouse IL-4 antibody (10  $\mu$ g/mL; BD Biosciences), or into Th2 cells by culturing with human rIL-2 (100 U/mL), mouse IL-4 (20 ng/mL; Peprotech), anti-mouse IL-12 antibody (10  $\mu$ g/mL; BD Biosciences), and anti-mouse IFN- $\gamma$  antibody (10  $\mu$ g/mL; BD Biosciences).

**Generation of Stable Cell Lines by Lentiviral Infection.** Full-length human NEDD8 cDNA (aa 1–76) was subcloned into pLENTI6/V5-DEST lentiviral expression vector (Invitrogen) in frame with an N-terminal 3 $\times$  FLAG epitope. The resulting plasmids were packaged into virus particles using the ViraPower Lentiviral Expression System (Invitrogen). Jurkat E6.1 cells were infected with lentivirus together with 5  $\mu$ g/mL polybrene by centrifuging cells at 420  $\times$  g for 60 min. After infection, cells were selected in the presence of blasticidin for 2 wk.

**Immunoprecipitation and Immunoblotting.** Cell pellets were lysed in 2 $\times$  Laemmli sample buffer. Cell lysates were resolved by SDS/PAGE and immunoblotted with the appropriate antibodies. For detection of NEDD8 conjugate proteins, cells were lysed with 1% SDS in Tris-buffered saline [50 mmol/L Tris (pH 7.5) and 150 mmol/L NaCl] supplemented with 10 mmol/L N-ethylmaleimide, incubated at 95  $^{\circ}$ C for 10 min, and then diluted to 0.1% SDS with Tris-buffered saline containing 1% Nonidet P-40. NEDD8-modified proteins were immunoprecipitated from diluted lysates using an anti-FLAG-M2 agarose bead (Sigma-Aldrich) for 4 h at 4  $^{\circ}$ C. The immunoprecipitates were eluted with triple-FLAG peptide. The eluates were subjected to Western blot analysis using the indicated antibodies.

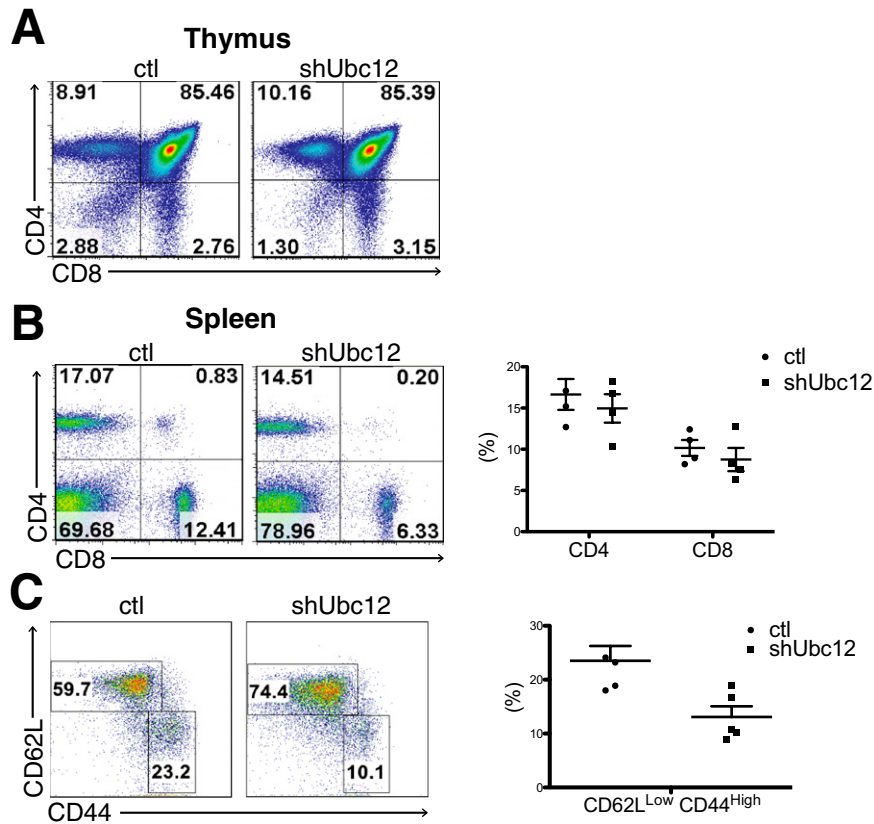

**Fig. S1.** Normal T-cell development in Ubc12 knockdown mice, as demonstrated by phenotypic analysis of Ubc12 shRNA-expressing chimeric mice. (A) Flow cytometry analysis of thymocytes in control and Ubc12 shRNA-expressing chimeric mice stained with anti-CD4 and anti-CD8 ( $n = 4$ ). (B) Flow cytometry analysis of splenocytes from control and Ubc12 shRNA-expressing chimeric mice for CD4 and CD8 expression ( $n = 4$ ). (C) Representative FACS plot of CD4<sup>+</sup>-gated cells showing staining for CD62L and CD44. Lower percentages of CD4<sup>+</sup> memory T cells (CD62L<sup>Low</sup> and CD44<sup>High</sup>) were observed in the spleens of Ubc12 knockdown chimeric mice compared with WT mice.

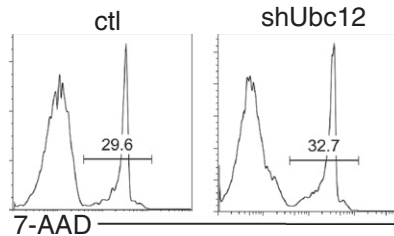

**Fig. S2.** Normal T-cell apoptosis by Ubc12 knockdown. Detection of 7-amino-actinomycin D (7-AAD)-positive apoptotic cells after 24 h of stimulation of CD4<sup>+</sup> T cells with anti-CD3/CD28 mAbs. Numbers above the bracketed lines indicate the percentage of 7-AAD-positive cells.

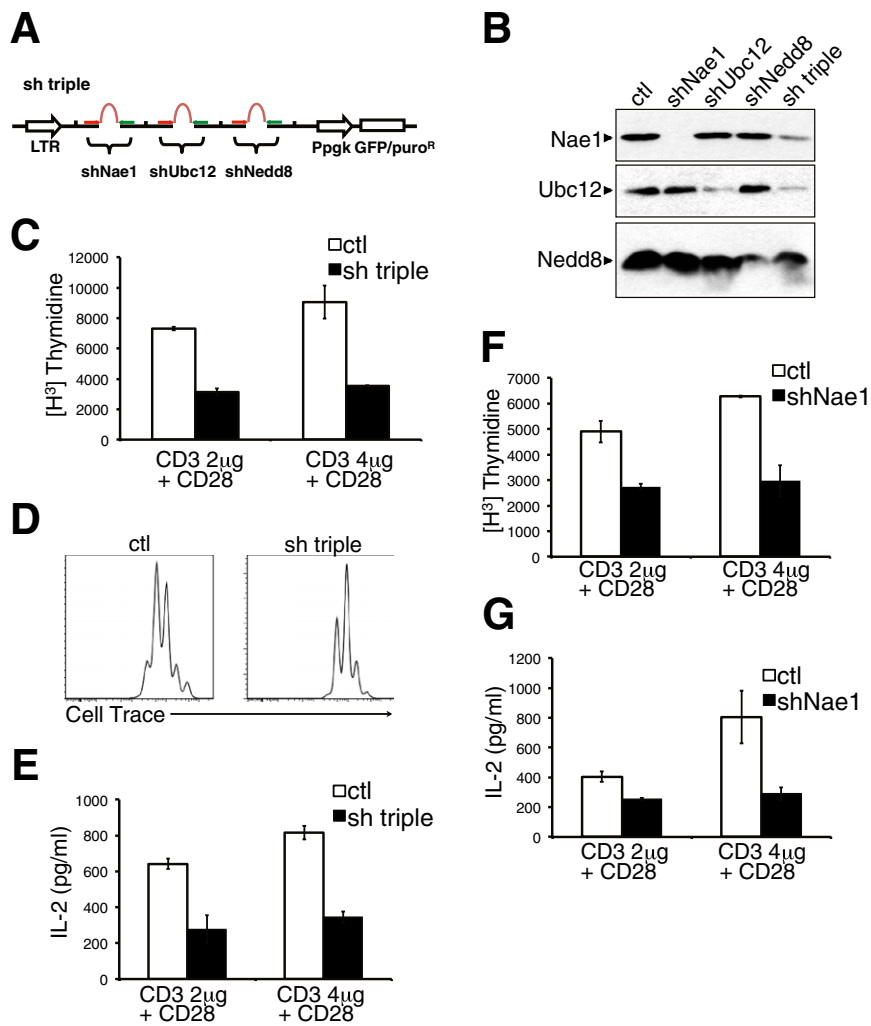

**Fig. S3.** Knockdown of the NEDD8 components affects T-cell function. Inhibition of the NEDD8 pathway by shRNA-mediated simultaneous knockdown of Nae1, Ubc12, and NEDD8 is shown. (A) Retroviral vector bearing multiple shRNAs targeting multiple genes (Nae1, Ubc12, and NEDD8). The pLMP vector encodes for a miR30-based target-specific shRNA under LTR promoter control. (B) Western blots of cell lysates from GFP<sup>+</sup>CD4<sup>+</sup> T cells expressing Nae1, Ubc12, or NEDD8 shRNA individually or combined (shTriple). (C) Decreased proliferation of CD4<sup>+</sup> T cells sorted from shTriple-expressing chimeric mice. CD4<sup>+</sup> T cells from control and shTriple-expressing chimeric mice were stimulated in vitro with anti-CD3/CD28 mAbs for 3 d. <sup>3</sup>H-thymidine was added to the culture during the last 8 h, followed by measurement of incorporation. (D) Proliferation of control (*Left*) and shTriple-expressing (*Right*) CD4<sup>+</sup> T cells assessed by CellTrace Violet division assay after stimulation with anti-CD3/CD28 mAbs. (E) Production of IL-2 from control and shTriple-expressing CD4<sup>+</sup> T cells assessed by ELISA after stimulation with anti-CD3/CD28 mAbs for 2 d. (F) Proliferation of CD4<sup>+</sup> T cells from Nae1 shRNA-expressing chimeric mice, measured as described above. (G) IL-2 production of CD4<sup>+</sup> T cells from Nae1 shRNA-expressing chimeric mice, measured as described above.

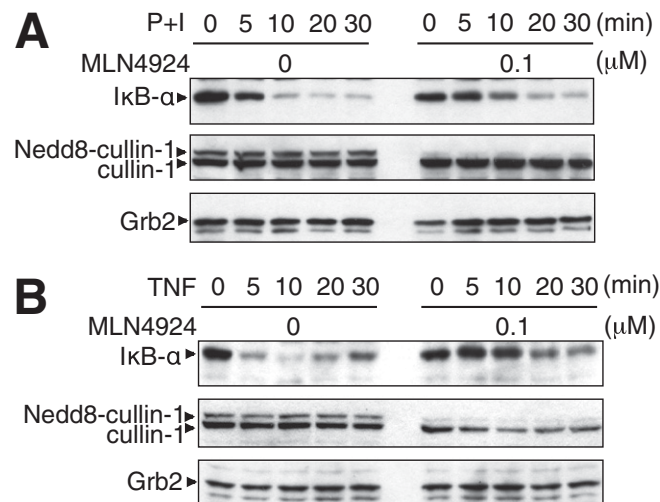

**Fig. 54.** Effect of MLN4924 on NF- $\kappa$ B activation. (A) CD4<sup>+</sup> T cells were preactivated with anti-CD3 in the presence of 0.1  $\mu$ M MLN4924 for 16 h and then stimulated with phorbol 12-myristate 13-acetate (100 ng/mL) and ionomycin (1  $\mu$ M) for the indicated time periods. Cell lysates were separated by SDS/PAGE and immunoblotted with the indicated antibodies. Grb2 was used as a loading control. (B) Jurkat cells pretreated with 0.1  $\mu$ M MLN4924 for 16 h were stimulated with TNF- $\alpha$  (10 ng/mL).

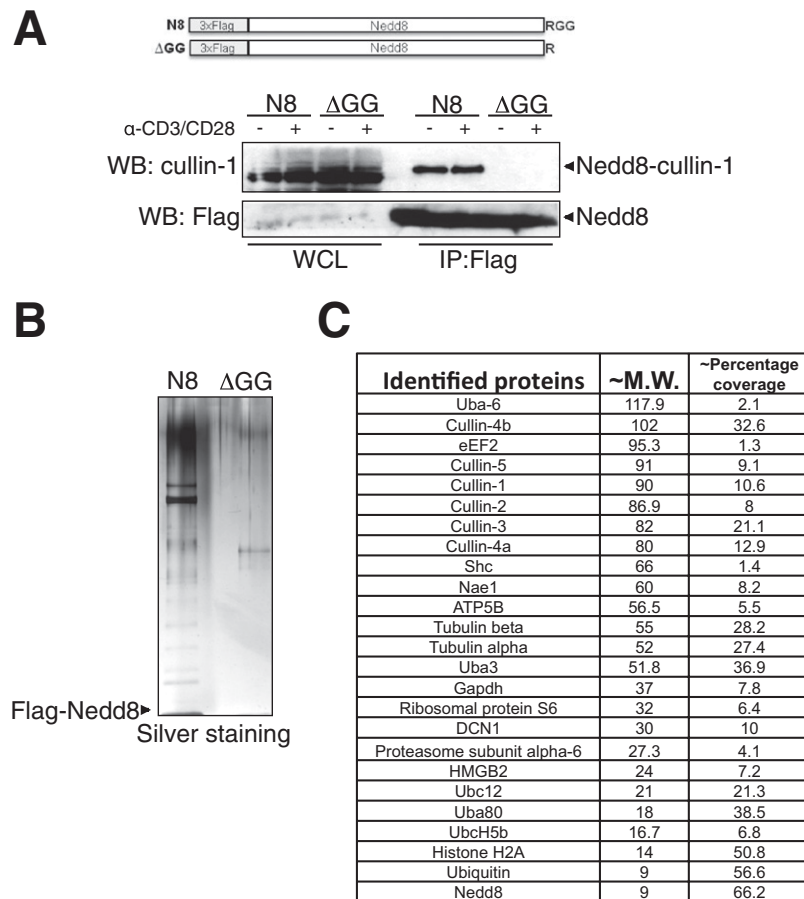

**Fig. 55.** Identification of NEDD8-conjugated proteins by MS. (A) The 3 $\times$  Flag-NEDD8  $\Delta$ GG denotes the NEDD8 mutant in which the last two glycine residues are deleted. To purify NEDD8-modified proteins under denaturing conditions, a JE6.1 stable cell line expressing 3 $\times$  FLAG-NEDD8 or 3 $\times$  FLAG-NEDD8 mutant ( $\Delta$ GG) was lysed in 1% SDS lysis buffer and denatured at 100  $^{\circ}$ C, after which the SDS was diluted 10-fold with 1% Triton X-100 buffer and then immunoprecipitated with anti-FLAG-conjugated beads, followed by elution with triple FLAG peptide. The eluates were subjected to Western blot and MS analyses. (B) Silver staining of affinity-purified FLAG-NEDD8-modified proteins. (C) Proteins identified in the FLAG-NEDD8 sample, but not in the FLAG-NEDD8 mutant ( $\Delta$ GG) sample.
